# Supplementary material
Source: Royal Society of Chemistry journal article supplement (doi:10.1039/d6cc02413k)
Supplement: d6cc02413k1.pdf [file d6cc02413k1.pdf]

*Supplementary information*

**Dual-molten-salt engineering of accessible active sites in single-atom Fe-NC catalysts**

Peng Yu,<sup>a</sup> Yazhou Zhou,<sup>a,b</sup> Guangbo Chen,<sup>\*c</sup> Xiafang Tao<sup>\*b,d</sup>

<sup>a</sup>School of Materials Science and Engineering, Jiangsu University, Zhenjiang 212013, China.

<sup>b</sup>Nanotechnology Centre, Centre for Energy and Environmental Technologies (CEET), VŠB-Technical University of Ostrava, 17. listopadu 2172/15, Ostrava-Poruba 708 00, Czech Republic

<sup>c</sup>Key Laboratory of Photochemical Conversion and Optoelectronic Materials, Technical Institute of Physics and Chemistry, Chinese Academy of Sciences, Beijing, 100190 China.

<sup>d</sup>Max Planck Institute for Polymer Research, 55128 Mainz, Germany

This file includes:

Figures S1 to S10

Tables S1 to S8

Methods

Characterizations

Electrochemical measurements

Quantification of the Active Sites

Supporting References

## 1. Methods

**Preparation of ZIF-8.** 3.58 g of  $\text{Zn}(\text{NO}_3)_2 \cdot 6\text{H}_2\text{O}$  was dissolved in 300 mL of methanol. 3.94 g of 2-methylimidazole was dissolved in 300 mL of methanol. The two solutions were then mixed and maintained at 60 °C under continuous stirring for 24 h. The resulting precipitate was collected by centrifugation, washed three times with methanol, and dried under vacuum to obtain ZIF-8 powder.

**Preparation of NC Support.** NC supports were prepared via a molten-salt-assisted pyrolysis of ZIF-8. Typically, ZIF-8 was physically mixed with NaCl and KCl by gentle grinding with a mortar and pestle for 10 min. The mixture was pyrolyzed at 910 °C for 2 h under an Ar atmosphere with a heating rate of 5 °C  $\text{min}^{-1}$ , followed by natural cooling to room temperature. The product was washed three times with deionized water to remove any residual NaCl, then dried at 80 °C overnight. The typical mass ratio of ZIF-8: NaCl: KCl was 1:0.25:0.75, and the resulting sample was denoted as NC/NaK. For comparison, NC/NaCl and NC/KCl were prepared using ZIF-8: NaCl = 1:1 and ZIF-8: KCl = 1:1, respectively, while salt-free NC was obtained by direct pyrolysis of ZIF-8 under identical conditions.

**Preparation of Fe-NC catalysts.** Fe-NC catalysts were prepared via an impregnation-pyrolysis method. Typically, 50 mg of NC supports (NC, NC/NaCl, NC/KCl, or NC/NaK) were dispersed in 50 mL of methanol by ultrasonication. 5 mg of iron ethylenediaminetetraacetic acid sodium salt (Fe-EDTA) was dissolved in methanol and then added to the above suspension. The mixture was stirred for 12 h to ensure sufficient adsorption of the Fe precursor onto the carbon supports. The resulting solid was collected by centrifugation, washed with methanol, and dried under vacuum at 60 °C. Subsequently, the dried powder was subjected to a second pyrolysis at 900 °C for 1 h under an Ar atmosphere with a heating rate of 10 °C  $\text{min}^{-1}$ , followed by natural cooling to room temperature. The obtained catalysts were denoted as Fe-NC, Fe-NC/NaCl, Fe-NC/KCl, and Fe-NC/NaK, respectively.

## 2. Characterizations

The morphology and microstructure of the samples were characterized by transmission electron microscopy (TEM, JEM-1400plus) and high-resolution TEM (HRTEM, JEOL JEM-2100F). Aberration-corrected high-angle annular dark-field scanning TEM (AC-HAADF-STEM, FEI Themis Z) was employed to examine the dispersion of Fe species. X-ray diffraction (XRD, Bruker D8 Advance, Cu  $K\alpha$  radiation,  $\lambda = 1.54 \text{ \AA}$ ) was used to analyze the crystal structure. The specific surface area and pore size distribution were determined by  $\text{N}_2$  adsorption-desorption measurements (Quantachrome Autosorb IQ MP) using the Brunauer-Emmett-Teller (BET) and density functional theory (DFT) methods. The elemental composition and chemical states were analyzed by X-ray photoelectron spectroscopy (XPS, Thermo Scientific K-Alpha). The Fe loading was quantified by inductively coupled plasma optical emission spectroscopy (ICP-OES, Agilent 5110). X-ray absorption fine structure (XAFS) measurements at the Fe K-edge were performed at the 1W1B beamline of the Shanghai Synchrotron Radiation Facility (SSRF), operated at 2.5 GeV with a maximum current of 250 mA. The extended X-ray absorption fine structure (EXAFS) data were processed and analyzed using the ATHENA

module implemented in the IFEFFIT software package according to standard procedures.

### 3. Electrochemical Measurements

Electrochemical measurements were carried out on a CHI760E electrochemical workstation using a standard three-electrode configuration at room temperature. A rotating disk electrode (RDE) or rotating ring-disk electrode (RRDE, glassy carbon, 5 mm diameter) was used as the working electrode, with a carbon rod as the counter electrode and an Ag/AgCl (3 M KCl) electrode as the reference electrode. The catalyst ink was prepared by dispersing 2.5 mg of catalyst in a mixed solution of 490  $\mu\text{L}$  ethanol and 10  $\mu\text{L}$  Nafion solution (5 wt%) under ultrasonication. Then, 30  $\mu\text{L}$  of the ink was drop-cast onto the glassy carbon electrode, resulting in a catalyst loading of  $\sim 0.76 \text{ mg cm}^{-2}$ . Cyclic voltammetry (CV) was conducted in  $\text{N}_2$ - and  $\text{O}_2$ -saturated 0.5 M  $\text{H}_2\text{SO}_4$  at a scan rate of  $50 \text{ mV s}^{-1}$ . Linear sweep voltammetry (LSV) was performed in  $\text{O}_2$ -saturated 0.5 M  $\text{H}_2\text{SO}_4$  at a scan rate of  $5 \text{ mV s}^{-1}$  with a rotation speed of 900 rpm. RRDE measurements were conducted with the ring electrode held at 1.2 V (vs. RHE) to determine the  $\text{H}_2\text{O}_2$  yield and electron transfer number. For comparison, Pt/C catalyst was tested in 0.1 M  $\text{HClO}_4$  to avoid performance loss caused by bisulfate adsorption. All potentials were converted to the reversible hydrogen electrode (RHE) scale, according to the following equation.

$$E(\text{RHE}) = 0.059pH + E(\text{Ag}/\text{AgCl}) + E_0(\text{Ag}/\text{AgCl}) \quad (1)$$

The yield of hydrogen peroxide and the number of electron transfers are calculated by the following equations:

$$H_2O_2(\%) = 200 \times \frac{I_r/N}{I_d + I_r/N} \times 100\%$$

$$n = 4 \times \frac{I_d}{I_d + I_r/N} \quad (2)$$

$I_r$  is the ring current,  $i_d$  is the disk current, and  $N = 0.37$  is the Pt ring current.

### 4. Quantification of the Active Sites

The density of Fe active sites of Fe-NC materials were determined according to the method described by Malko et al (doi.org/10.1038/ncomms13285, Nat. Commun. 7, 13285 (2016)). The calculation formula is as follows:

$$SD (\text{site } g^{-1}) = \frac{Q_{strip} \times N_A}{n_{strip} \times F \times m_{cat}}$$

(4)

$$TOF (e^- \cdot site^{-1} \cdot s^{-1}) = \frac{i_k \times N_A}{SD \times nF}$$

(5)

where  $Q_{strip}$  ( $C g^{-1}$ ) refers to the excess Coulomb charge associated with the stripping peak,  $F$  refers to Faraday's constant ( $F = 96485 C mol^{-1}$ ),  $N_A$  Avogadro's constant ( $N_A = 6.02 \times 10^{23}$ ),  $n_{strip}$  refers to the number of electrons associated with the reduction of one nitrite per site ( $n_{strip} = 5$ ),  $L_{cat}$  refers to the mass of the catalyst, and  $J_k$  refers to the kinetic current density ( $J_k = \frac{i_L \times i}{i_L - i}$ ),  $i$  ( $A g^{-1}$ ) is the current and  $i_L$  is the limit diffusion current at 0.8 V (RHE) in the LSV curve. Loading of Fe-NC was  $0.76 mg cm^{-2}$ .

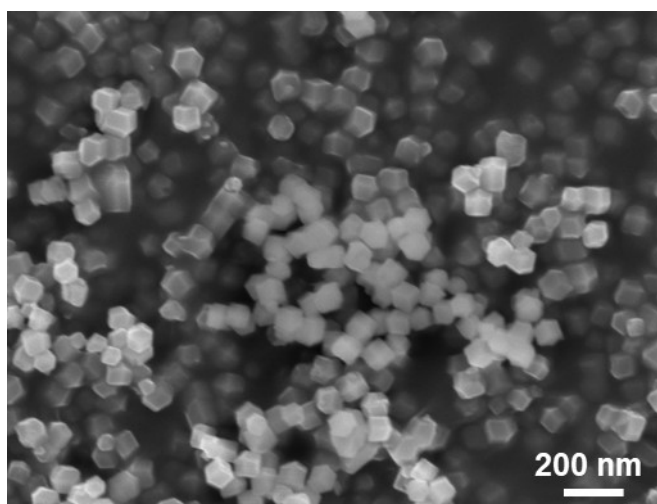

**Fig. S1** SEM images of ZIF-8.

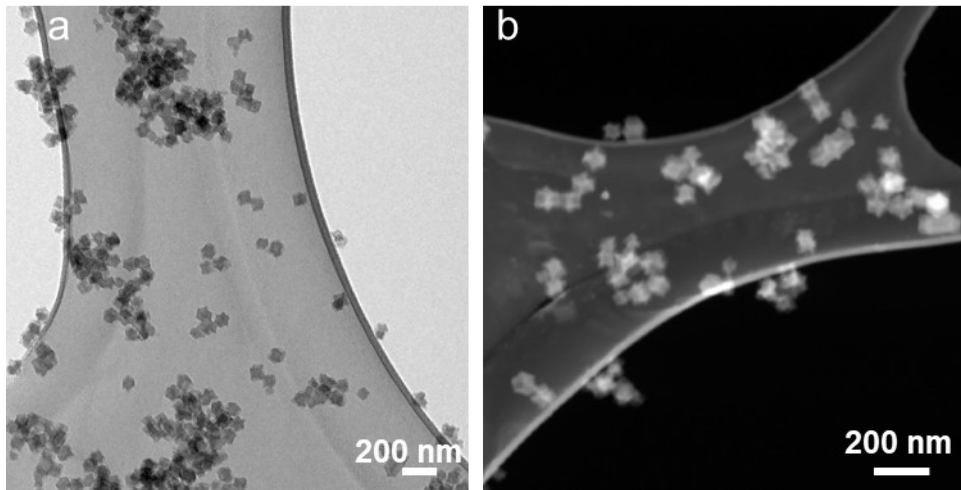

**Fig. S2** (a) TEM and (b) HAADF-STEM images of salt-free NC.

**Table S1.** Porosity properties of the NC supports.

| <b>Catalyst</b> | <b>BET surface area<br/>(m<sup>2</sup> g<sup>-1</sup>)</b> | <b>Micropore area<br/>(m<sup>2</sup> g<sup>-1</sup>)</b> | <b>External surface area<br/>(m<sup>2</sup> g<sup>-1</sup>)</b> |
|-----------------|------------------------------------------------------------|----------------------------------------------------------|-----------------------------------------------------------------|
| NC              | 1341.4                                                     | 1046.7                                                   | 294.8                                                           |
| NC/NaCl         | 1724.8                                                     | 1367.7                                                   | 357.1                                                           |
| NC/KCl          | 2590.1                                                     | 1988.0                                                   | 602.1                                                           |
| NC/NaK          | 2243.5                                                     | 1841.1                                                   | 402.5                                                           |

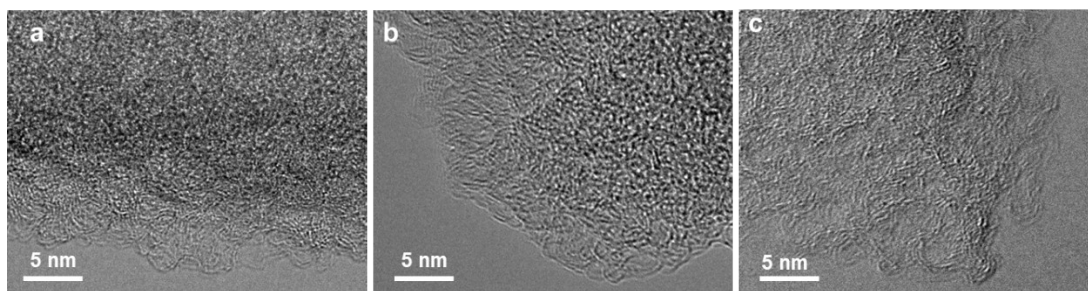

**Fig. S3** High-resolution TEM images of (a) Fe-NC, (b) Fe-NC/NaCl, and (c) Fe-NC/KCl.

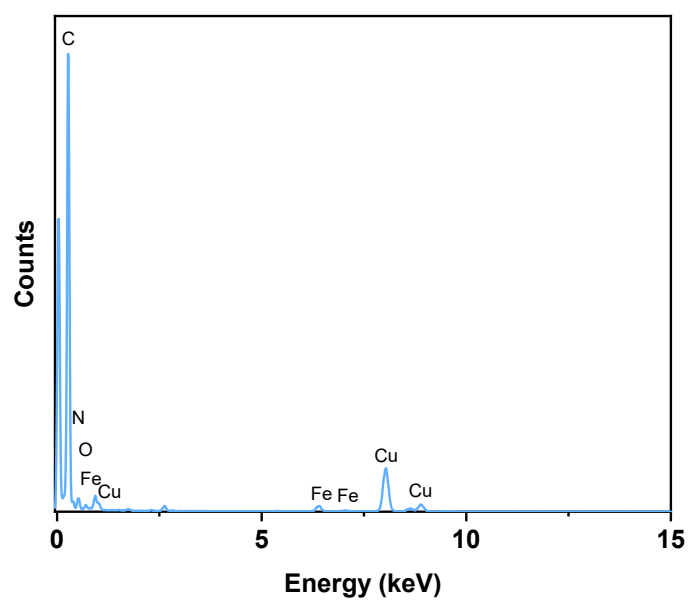

**Fig. S4.** TEM-EDS spectrum of Fe-NC/NaK.

**Table S2.** Fe loadings in Fe-NC materials by ICP-OES tests.

| <b>Catalyst</b> | <b>Fe loading (wt%)</b> |
|-----------------|-------------------------|
| Fe-NC           | 1.1                     |
| Fe-NC/NaCl      | 1.3                     |
| Fe-NC/KCl       | 1.4                     |
| Fe-NC/NaK       | 1.4                     |

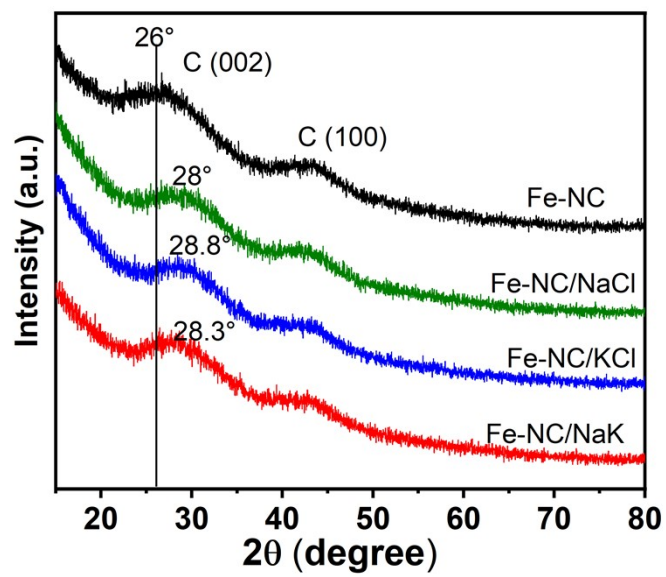

Fig. S5 XRD patterns of Fe-NC, Fe-NC, Fe-NC/NaCl, Fe-NC/KCl, and Fe-NC/NaK.

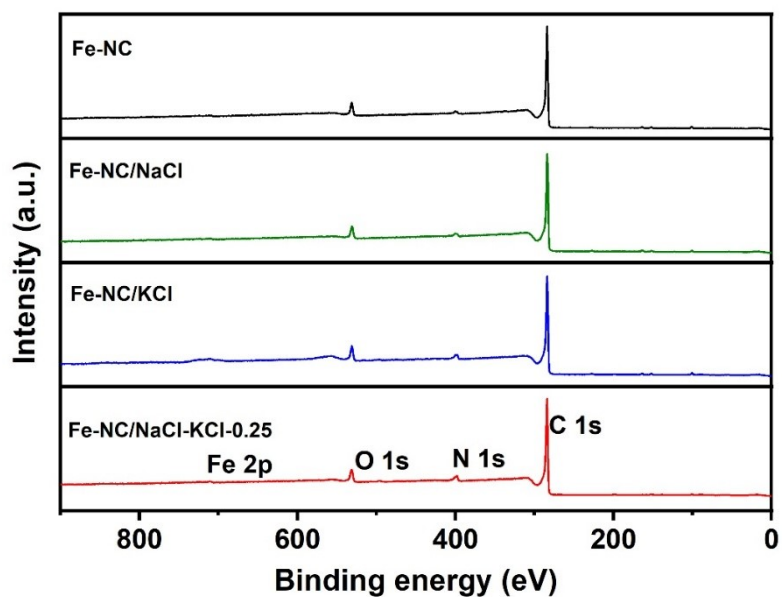

**Fig. S6** XPS survey spectra of Fe-NC/NaK, Fe-NC/NaCl, Fe-NC/KCl, and Fe-NC

**Table S3.** Fitting results for C 1s spectra of the Fe-NC/NaK, Fe-NC/KCl, Fe-NC/NaCl, and Fe-NC.

| Catalyst       | C=C        | C-N/C-O  | C=O        | $\pi$ - $\pi$ |
|----------------|------------|----------|------------|---------------|
| Binding energy | 284.8 (eV) | 286 (eV) | 288.5 (eV) | 290.5(eV)     |
| Fe-NC/NaK      | 57.6       | 23.14    | 8.39       | 10.83         |
| Fe-NC/KCl      | 60.31      | 18.56    | 12.69      | 8.43          |
| Fe-NC/NaCl     | 60.69      | 14.79    | 10.45      | 14.06         |
| Fe-NC          | 65.18      | 14.69    | 11.36      | 8.78          |

**Table S4.** Fitting results for N 1s spectra of the Fe-NC/NaK, Fe-NC/KCl, Fe-NC/NaCl, and Fe-NC.

| Catalyst       | Pyridinic N (%) | Pyrrolic N (%) | Graphitic N (%) | Fe-N (%)   | Oxidized N (%) |
|----------------|-----------------|----------------|-----------------|------------|----------------|
| Binding energy | 398.5 (eV)      | 400.8 (eV)     | 401.5 (eV)      | 399.7 (eV) | 403.4 (eV)     |
| Fe-NC/NaK      | 43.0            | 14.6           | 13.7            | 14.2       | 14.4           |
| Fe-NC/KCl      | 38.8            | 15.7           | 11.5            | 15.3       | 18.4           |
| Fe-NC/NaCl     | 29.1            | 16.8           | 22.2            | 17.2       | 14.5           |
| Fe-NC          | 28.6            | 21.8           | 21.6            | 8.8        | 19.1           |

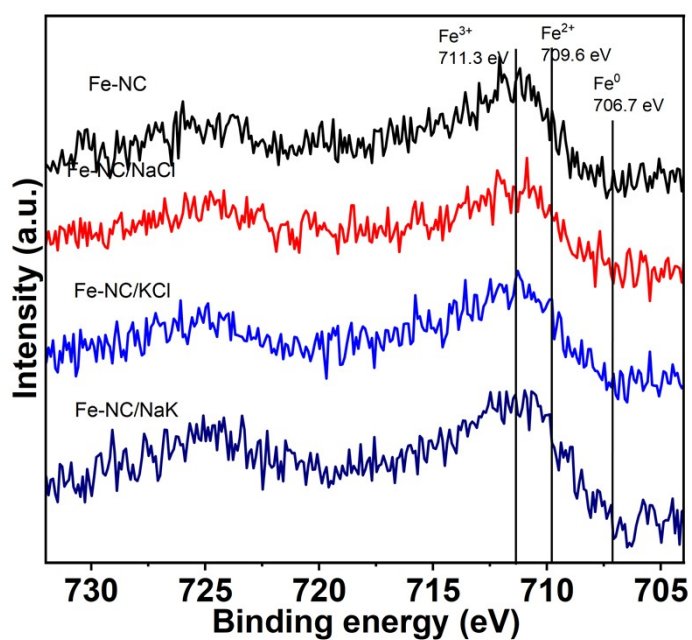

**Fig. S7** High-resolution Fe 2p XPS spectra for Fe-NC/NaK, Fe-NC/NaCl, Fe-NC/KCl, and Fe-NC.

**Table S5.** Structural parameters of the Fe-NC/NaK extracted from the EXAFS fitting. The FeO, Fe<sub>2</sub>O<sub>3</sub>, and Fe foil were reference materials.

| Sample                             | Path   | <i>N</i> | <i>R</i> (Å) | $\sigma^2$ ( $\times 10^{-3}$ Å <sup>2</sup> ) | $\Delta E_0$ (eV) | <i>R</i> , % |
|------------------------------------|--------|----------|--------------|------------------------------------------------|-------------------|--------------|
| <b>Fe foil</b> <sup>[a]</sup>      | Fe-Fe  | <b>8</b> | 2.47±0.01    | 5±1                                            | 6±2               | 0.53         |
|                                    | Fe-Fe  | <b>6</b> | 2.85±0.01    | 6±2                                            |                   |              |
| <b>FeO</b>                         | Fe-O   | 6        | 2.12 ± 0.02  | 14.9 ± 2.1                                     | -1.53 ± 0.5       | 0.009        |
|                                    | Fe-Fe  | 12       | 3.06 ± 0.01  | 11.74±1.0                                      | -2.61±1.1         |              |
| <b>Fe<sub>2</sub>O<sub>3</sub></b> | Fe-O   | 6        | 1.96 ± 0.03  | 10.95 ± 2.1                                    | 7.51± 3.2         | 0.018        |
|                                    | Fe-Fe  | 6        | 2.98±0.02    | 8.85±1.72                                      |                   |              |
| <b>Fe-NC/NaK</b> <sup>[b]</sup>    | Fe-N/O | 6.0±0.6  | 2.00±0.02    | 11±1                                           | -6±1              | 0.42         |

[a]: *k* range: 3-13.6 (Å<sup>-1</sup>); *R* range: 1-3 Å; [f]: *k* range: 3-12 (Å<sup>-1</sup>); *R* range: 1.0-2 Å; *S*<sub>0</sub><sup>2</sup> = 0.68 and determined from Fe foil. The bolded numbers represent fixed coordination numbers

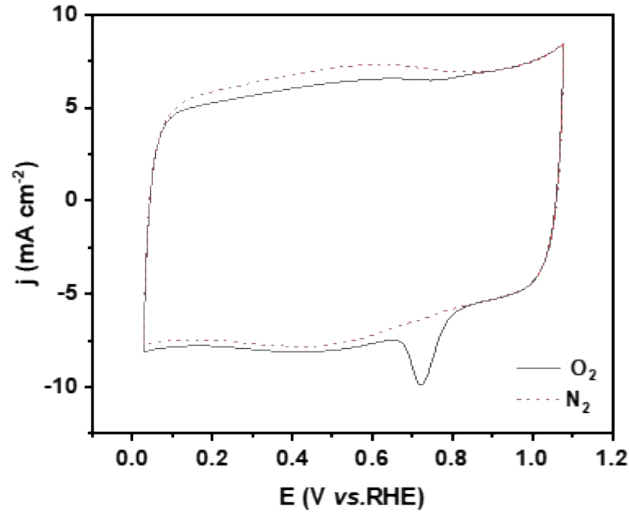

**Fig. S8** CV curves of Fe-NC/NaK at a scan rate of 5 mV s<sup>-1</sup> in O<sub>2</sub>/N<sub>2</sub>-saturated 0.5 M H<sub>2</sub>SO<sub>4</sub>.

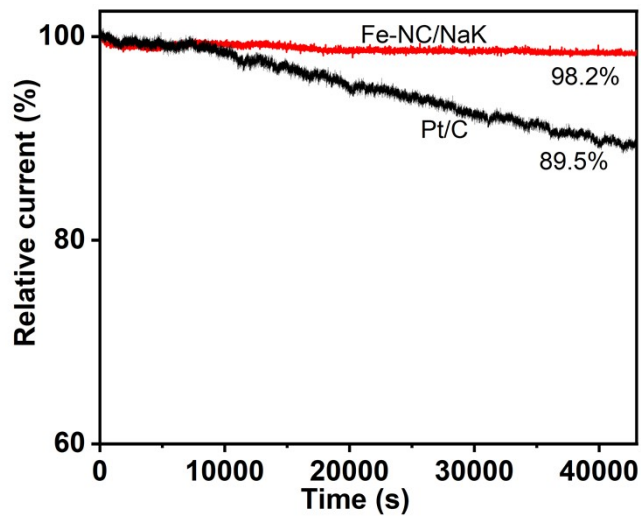

**Fig. S9** Chronoamperometric stability of Fe-NC/NaK and Pt/C measured at 0.82 V (vs. RHE) in O<sub>2</sub>-saturated 0.5 M H<sub>2</sub>SO<sub>4</sub>.

**Table S6.** ORR performance parameters of Fe-NC samples and Pt/C.

| <b>Catalyst</b> | <b><math>E_{\text{onset}}</math> (V)</b> | <b><math>E_{1/2}</math> (V)</b> | <b><math>J_L</math><br/>(mA cm<sup>-2</sup>)</b> | <b><math>J_k@0.80</math> V<br/>(mA cm<sup>-2</sup>)</b> | <b>Tafel slope<br/>(mV dec<sup>-1</sup>)</b> |
|-----------------|------------------------------------------|---------------------------------|--------------------------------------------------|---------------------------------------------------------|----------------------------------------------|
| Fe-NC           | 0.87                                     | 0.77                            | -4.2                                             | 1.4                                                     | 66                                           |
| Fe-NC/NaCl      | 0.88                                     | 0.79                            | -3.9                                             | 2.7                                                     | 64                                           |
| Fe-NC/KCl       | 0.89                                     | 0.80                            | -3.8                                             | 3.5                                                     | 63                                           |
| Fe-NC/NaK       | 0.91                                     | 0.82                            | -4.0                                             | 9.7                                                     | 55                                           |
| Pt/C            | 0.94                                     | 0.83                            | -4.5                                             | 13.1                                                    | 50                                           |

**Table S7.** Summary of Fe loading, SD, utilization, and TOF of Fe sites for Fe-NC catalysts, derived from nitrite stripping and kinetic current analysis.

| <b>Catalyst</b> | <b>Fe loading<br/>(wt%)</b> | <b>SD<br/>(sites g<sup>-1</sup>)</b> | <b>Utilization<br/>(%)</b> | <b>TOF<br/>(e<sup>-</sup>·site<sup>-1</sup> s<sup>-1</sup>)</b> |
|-----------------|-----------------------------|--------------------------------------|----------------------------|-----------------------------------------------------------------|
| Fe-NC           | 1.1                         | 9.1×10 <sup>18</sup>                 | 7.7                        | 1.2                                                             |
| Fe-NC/NaCl      | 1.3                         | 1.4×10 <sup>19</sup>                 | 10                         | 1.6                                                             |
| Fe-NC/KCl       | 1.4                         | 2.3×10 <sup>19</sup>                 | 15.2                       | 1.2                                                             |
| Fe-NC/NaK       | 1.4                         | 4.0×10 <sup>19</sup>                 | 27                         | 2.0                                                             |

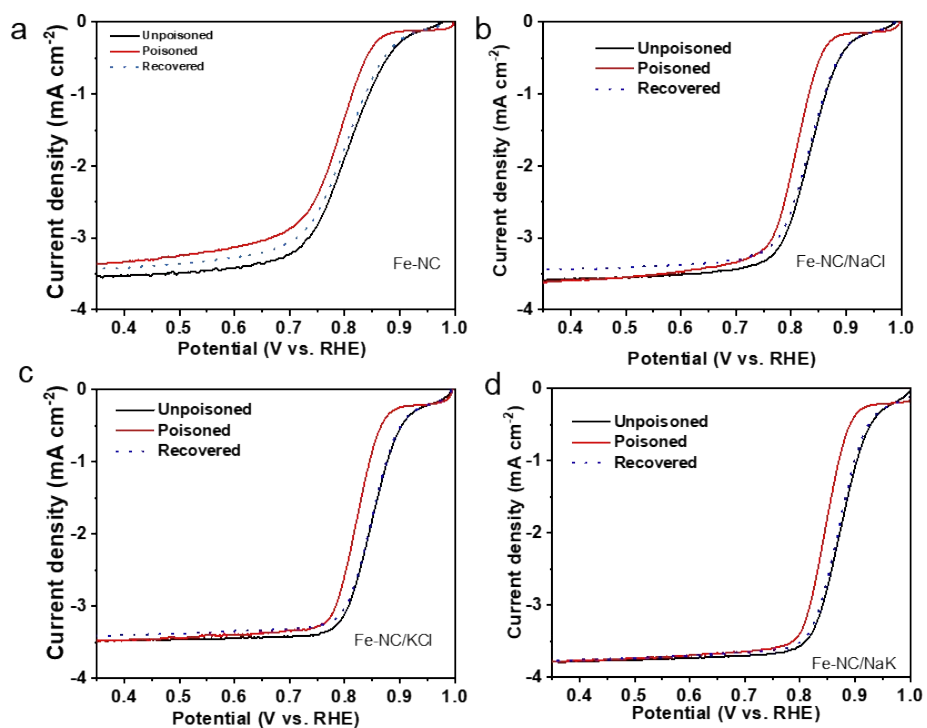

**Fig. S10** Determination of the site density (SD) of Fe site. ORR LSV curves before, during and after nitrite adsorption in an O<sub>2</sub>-saturated 0.5 M acetate buffer at pH 5.2 for (a) Fe-NC, (b) Fe-NC /NaCl, (c) Fe-NC /KCl, and (d) Fe-NC /NaK. Catalyst loading: 0.27 mg cm<sup>-2</sup>.

**Table S8.** Comparison of structural and electrochemical properties of Fe-N-C catalysts reported in the literature. SD: site density, Utilization of active sites. Some parameters were not reported in the original papers and are indicated as “—”.

| Catalyst                                      | BET<br>area(m <sup>2</sup> g <sup>-1</sup> ) | SD<br>(×10 <sup>19</sup> sites g <sup>-1</sup> ) | Utilization<br>(%) | <i>E</i> <sub>1/2</sub>                  | Ref              |
|-----------------------------------------------|----------------------------------------------|--------------------------------------------------|--------------------|------------------------------------------|------------------|
| <b>Fe-NC/NaK</b>                              | <b>2243</b>                                  | <b>4</b>                                         | <b>27</b>          | <b>0.82(H<sub>2</sub>SO<sub>4</sub>)</b> | <b>This work</b> |
| Fe-N/C                                        | 1145                                         | 1.42                                             | 1.85               | —                                        | 1                |
| Fe-N-C-SMV                                    | 1048.6                                       | 2.48                                             | 17.69              | 0.84(H <sub>2</sub> SO <sub>4</sub> )    | 2                |
| MC-Fe-NC                                      | 1068                                         | 5.62                                             | —                  | 0.81(H <sub>2</sub> SO <sub>4</sub> )    | 3                |
| TPI@Z8(SiO <sub>2</sub> )<br>650-C            | 1648                                         | 3.42                                             | 11.4               | —                                        | 4                |
| nano-e-FeNC                                   | —                                            | 2.41                                             | —                  | 0.83(H <sub>2</sub> SO <sub>4</sub> )    | 5                |
| 3D Fe-N-C                                     | 1399.15                                      | 3.16                                             | 21.9               | 0.82(H <sub>2</sub> SO <sub>4</sub> )    | 6                |
| Fe-pyridinic N-<br>C                          | 1371                                         | —                                                | —                  | 0.82(HClO <sub>4</sub> )                 | 7                |
| Fe@ Fe-N-C                                    | 1290                                         | —                                                | —                  | 0.82(HClO <sub>4</sub> )                 | 8                |
| CNRS                                          | 840                                          | 1.44                                             | 2.5                | —                                        | 9                |
| Fe <sub>SA</sub> /Fe <sub>AC</sub> -<br>2DNPC | 995.4                                        | 2.01                                             | —                  | 0.81(H <sub>2</sub> SO <sub>4</sub> )    | 10               |
| Fe-N-C <sub>NH4I</sub>                        | 1413.7                                       | 2.15                                             | 10.3               | 0.924(KOH)                               | 11               |
| Fe-SA/N-HCS                                   | 1682.3                                       | 11                                               | 21                 | 0.91(KOH)                                | 12               |
| FeNC-CVD-750                                  | —                                            | 19.2                                             | 100                | 0.85(H <sub>2</sub> SO <sub>4</sub> )    | 13               |

## Supporting References

1. M. Gong, A. Mehmood, B. Ali, K. W. Nam and A. Kucernak, *ACS Catal.*, 2023, 13, 6661-6674.
2. J. Li, C. Lin, Z. Chen, J. Huang, B. Yang, M. Lin, P. K. Shen and Z. Q. Tian, *ACS Catal.*, 2025, 15, 20512-20530.
3. Y. Guan, L. Gao, D. Wu, J. He, H. Luo, Q. Liu, Y. Zhou, J. Luo, R. Li, Z. Kang, J. Li, X. Tian, S. Chen and Z. Miao, *J. Energy Chem.*, 2026, <https://doi.org/10.1016/j.jechem.2026.04.050>
4. X. Wan, X. Liu, Y. Li, R. Yu, L. Zheng, W. Yan, H. Wang, M. Xu and J. Shui, *Nat. Catal.*, 2019, 2, 259-268.
5. Q. Liu, W. Liu, X. Wan, W. Chen, X. Liu, X. Liu, J. Shang, J. Miao, D. Su, X. Sun and J. Shui, *Adv. Funct. Mater.*, 2025, 35, 2507376.
6. R. Wang, Y. Yang, Y. Zhao, L. Yang, P. Yin, J. Mao and T. Ling, *J. Energy Chem.*, 2021, 58, 629-635.
7. L. Li, Y. Wen, G. Han, Y. Liu, Y. Song, W. Zhang, J. Sun, L. Du, F. Kong, Y. Ma, Y. Gao, J. Wang, C. Du and G. Yin, *Chem. Eng. J.*, 2022, 437, 135320
8. L. Li, Y. Wen, G. Han, F. Kong, L. Du, Y. Ma, P. Zuo, C. Du and G. Yin, *Small*, 2023, 19, 2300758.
9. M. Primbs, Y. Sun, A. Roy, D. Malko, A. Mehmood, M.-T. Sougrati, P.-Y. Blanchard, G. Granozzi, T. Kosmala, G. Daniel, P. Atanassov, J. Sharman, C. Durante, A. Kucernak, D. Jones, F. Jaouen and P. Strasser, *Energy Environ. Sci.*, 2020, 13, 2480-2500.
10. X. Wan, Q. Liu, J. Liu, S. Liu, X. Liu, L. Zheng, J. Shang, R. Yu and J. Shui, *Nat. Commun.*, 2022, 13, 2963.
11. J. Liu, Y. Liu, B. Nan, D. Wang, C. Allen, Z. Gong, G. He, K. Fu, G. Ye and H. Fei, *Angew. Chem. Int. Ed. Engl.*, 2025, 64, e202425196.
12. L. Zong, K. Fan, L. Cui, F. Lu, P. Liu, B. Li, S. Feng and L. Wang, *Angew. Chem. Int. Ed. Engl.*, 2023, 62, e202309784.
13. L. Jiao, J. Li, L. L. Richard, Q. Sun, T. Stracensky, E. Liu, M. T. Sougrati, Z. Zhao, F. Yang, S. Zhong, H. Xu, S. Mukerjee, Y. Huang, D. A. Cullen, J. H. Park, M. Ferrandon, D. J. Myers, F. Jaouen and Q. Jia, *Nat. Mater.*, 2021, 20, 1385-1391.
